# Supplementary material
Source: Research Square preprint supplement (doi:10.21203/rs.3.rs-9601471/v1)
Supplement: Supplementary file 1 [file e6e57af700fb315ecdf9bb78.docx]

**Fig.S1** Functional annotation of the *Bacillus velezensis* SGTSH 0811 genome. (A) Gene Ontology (GO) classification of predicted genes across the three main ontologies: biological process, cellular component, and molecular function. (B) Kyoto Encyclopedia of Genes and Genomes (KEGG) pathway classification at level 2, showing the distribution of genes in major metabolic and cellular processes. (C) Clusters of Orthologous Groups (COG) functional classification of predicted proteins. Letters (A-Z) correspond to functional categories detailed in the legend.

**
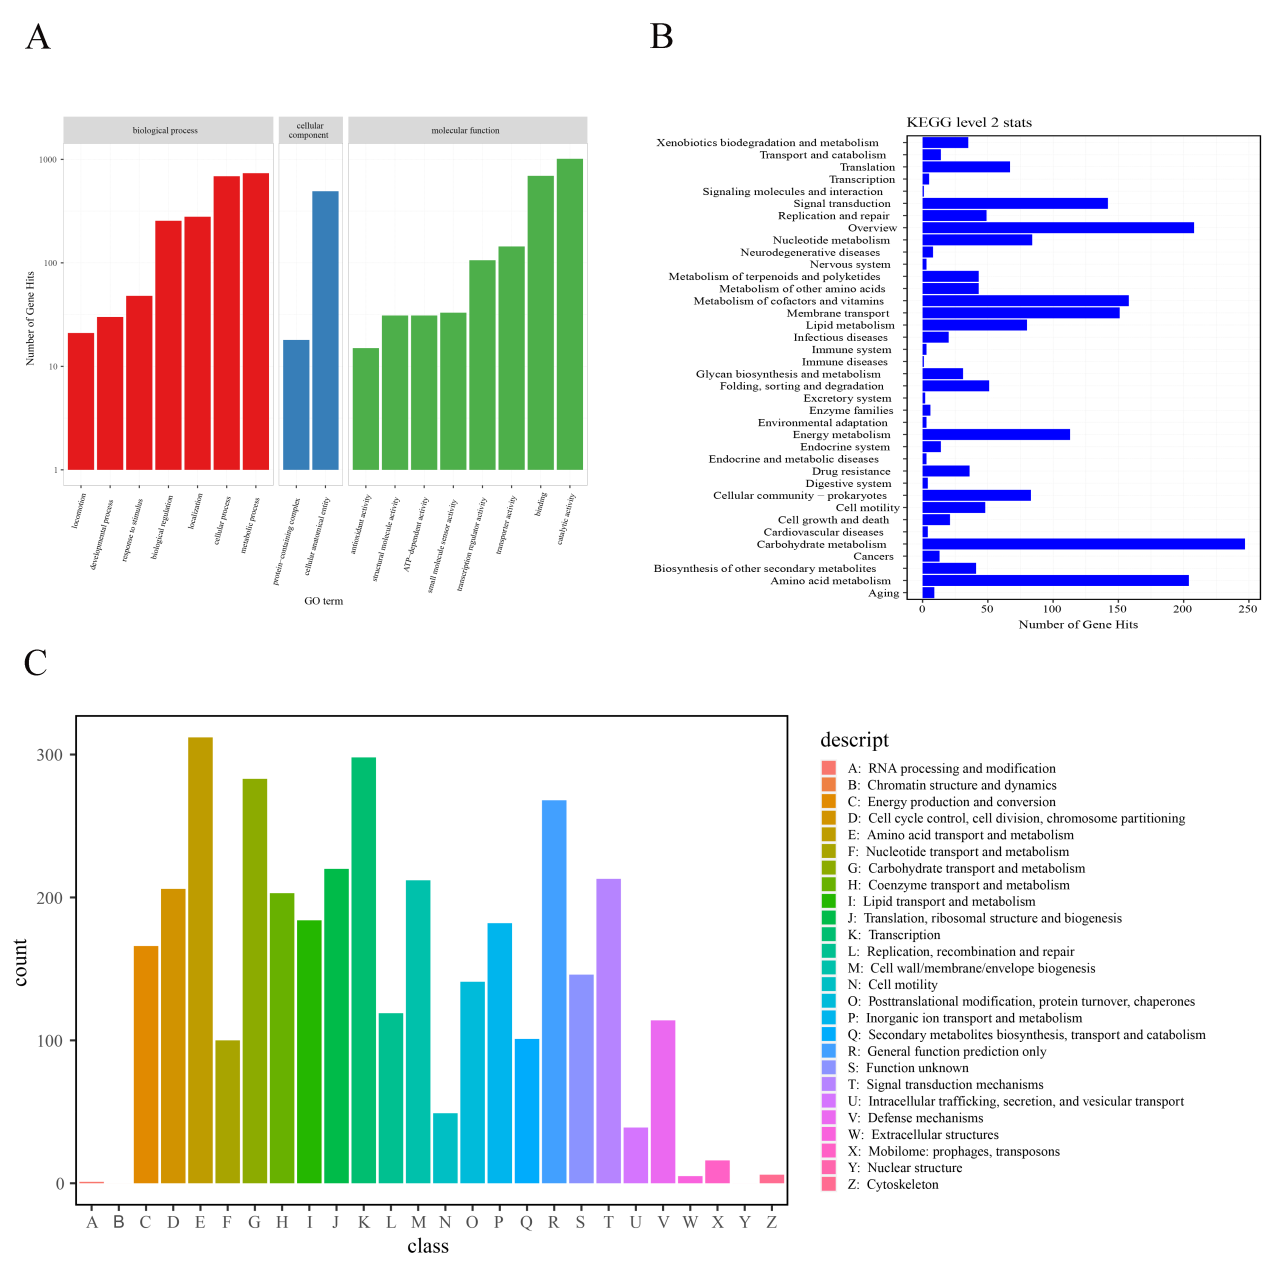
**

**Fig.S2** Broad-spectrum antifungal activity of strain SGTSH 0811. *In vitro* antagonistic activity of SGTSH 0811 against four phytopathogenic fungi. Data are presented as mean ± SD (*n*=3). Different letters indicate significant differences (Tukey’s test, *p* < 0.05).


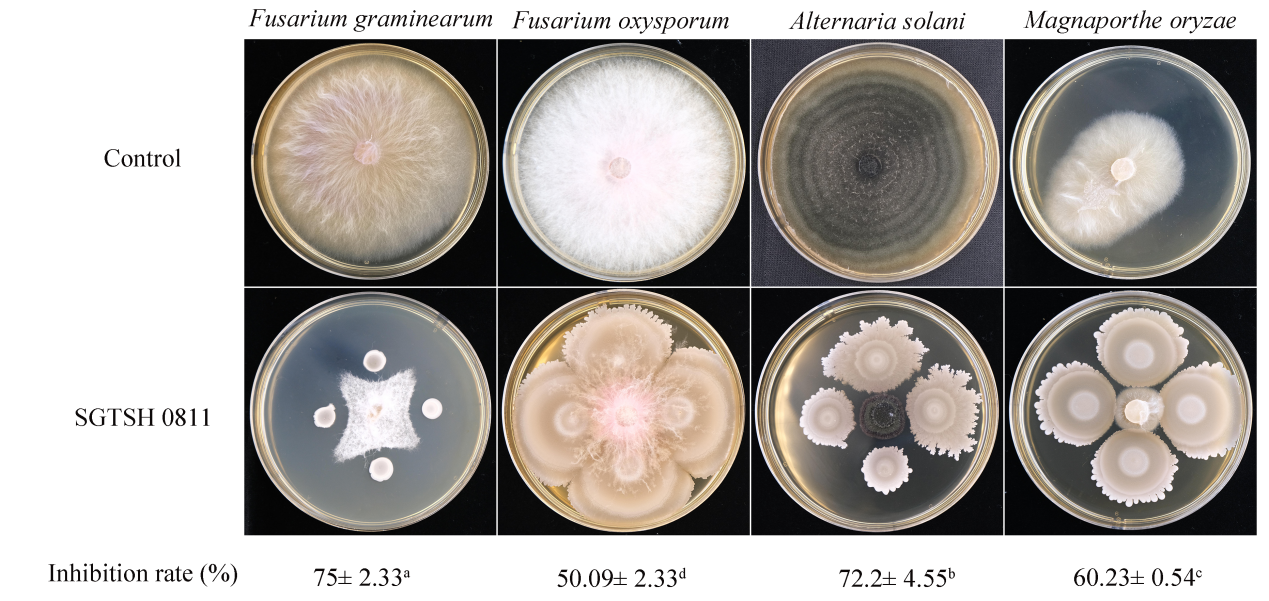


**Fig.S3** Control effect of strain SGTSH 0811 against *Sclerotinia sclerotiorum* on multiple host plants using a detached leaf assay. (A-C) Assay on tobacco leaves: (A) Representative disease symptoms, (B) leision diameter, and (C) control effect. (D-F) Assay on tomato leaves: (D) Representative disease symptoms, (E) leision diameter, and (F) control effect. (G-I) Assay on potato leaves: (G) Representative disease symptoms, (H) leision diameter, and (I) control effect. (J-L) Assay on cabbage leaves: (J) Representative disease symptoms, (K) leision diameter, and (L) control effect. (M-O) Assay on tomato fruits: (M) Representative disease symptoms, (N) leision diameter, and (O) control effect. Values are presented as means ± SD (*n* ≥ 5 leaves per treatment for A-L; *n* ≥ 9 fruits for M-N). Different letters indicate significant differences (Tukey’s test, *p* < 0.05).


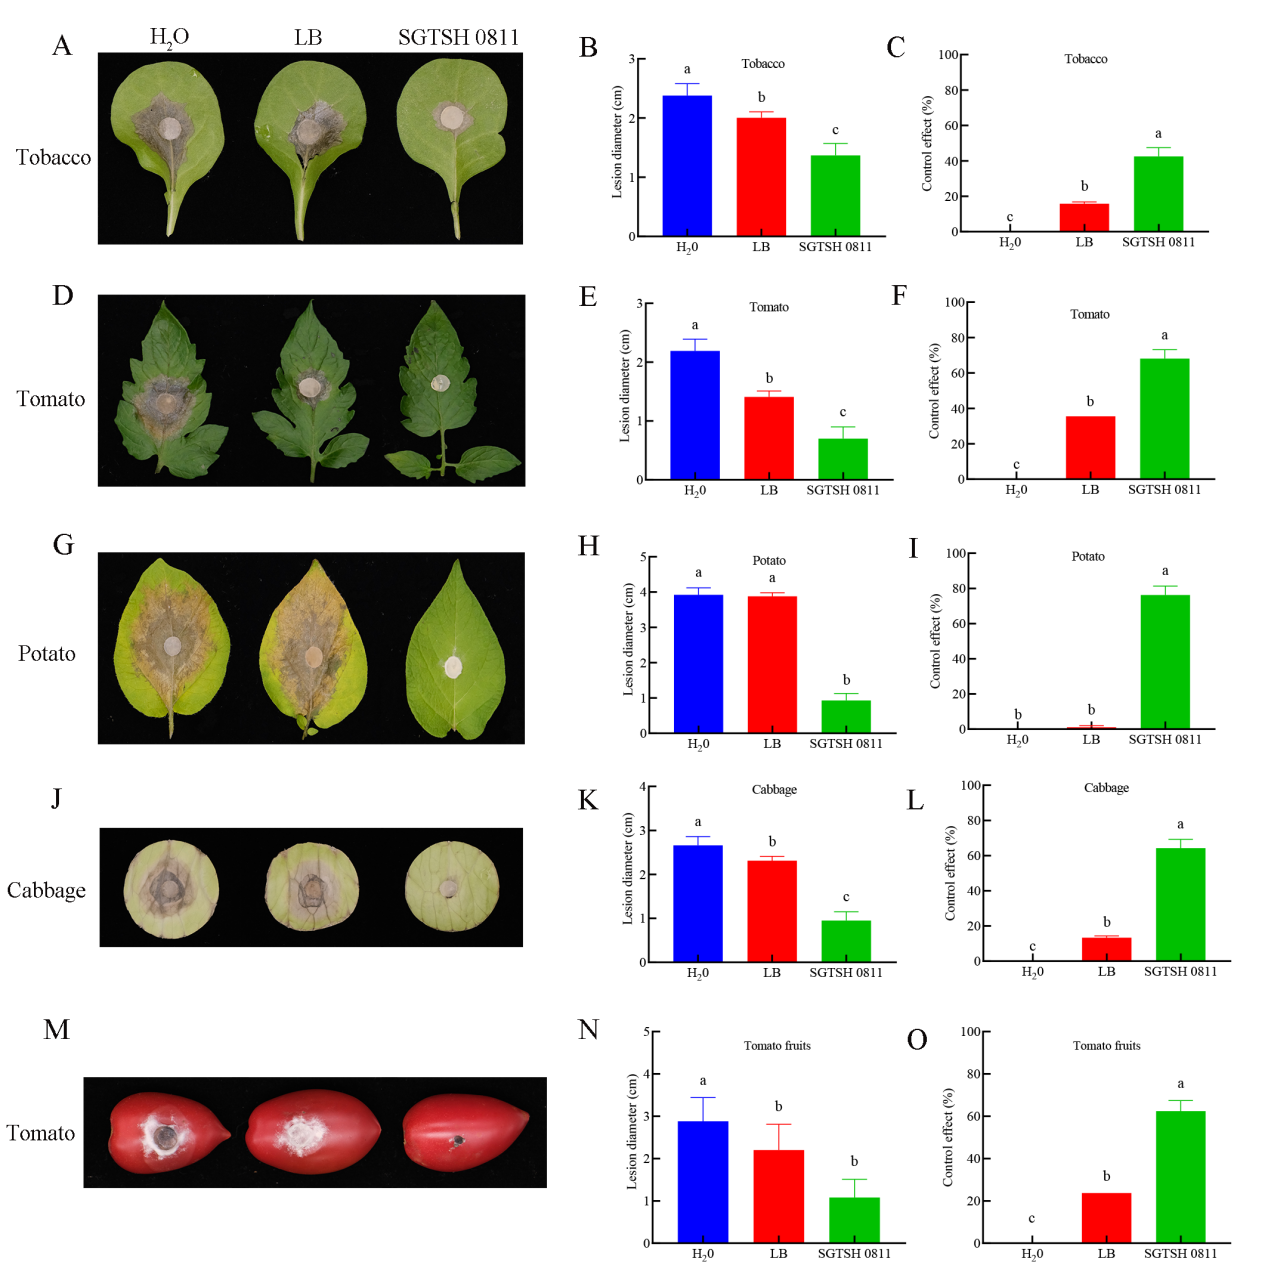


**Table 1** Genome features of strainSGTSH 0811

| Features | Chromosome Characteristics |
| --- | --- |
| Genome size (bp) | 3929781 |
| GC content (%) | 46.5 |
| CDS No. | 4038 |
| tRNA No. | 86 |
| rRNA No. | 27 |
| sRNA No. | 18 |
| Gene average len (bp) | 868.36 |
| Secondary metabolite gene clusters | 12 |

**Table S2** List of the predicted secondary metabolite biosynthesis gene clusters (BGCs)

| Region | Type | From | To | MIBiG accession | Most similar known cluster | Similarity(%) |
| --- | --- | --- | --- | --- | --- | --- |
| 1 | NRPS | 323415 | 387392 | BGC0000433 | [surfactin](https://mibig.secondarymetabolites.org/go/BGC0000433/1" \t "/Users/princess_wang/Documents\\x/_blank) | 82 |
| 2 | PKS-like | 924057 | 965301 | BGC0000693 | butirosin A/butirosin B | 7% |
| 3 | terpene | 1050179 | 1067587 | --- | --- | --- |
| 4 | lanthipeptide-class-II | 1188576 | 1217464 | --- | --- | --- |
| 5 | transAT-PKS | 1384083 | 1471918 | BGC0000181 | macrolactin H | 100% |
| 6 | transAT-PKS, T3PKS, NRPS | 1691447 | 1792012 | BGC0001089 | bacillaene | 100% |
| 7 | NRPS, transAT-PKS, betalactone | 1865754 | 2000064 | BGC0001095 | fengycin | 100% |
| 8 | terpene | 2028702 | 2050585 | --- | --- | --- |
| 9 | T3PKS | 2113902 | 2155002 | --- | --- | --- |
| 10 | transAT-PKS | 2282377 | 2376169 | BGC0000176 | difficidin | 100% |
| 11 | NRP-metallophore, NRPS, RiPP-like | 3000870 | 3052661 | BGC0000309 | bacillibactin | 100% |
| 12 | other | 3588968 | 3630386 | BGC0001184 | bacilysin | 100% |

**Table S3** Primer sequences of pathogen genes for real time fluorescent quantitative PCR

| Genes name | Sequences of primer (5′→3′) | Functional description |
| --- | --- | --- |
| *actin* | F: GAGCTGTTTTCCCTTCCATTGTC | Actin |
| R: GACGACACCGTGCTCGATTGG |
| *SS1G_05925* | F: CGAAGGTACCAACACTGCCT | Dothistromin biosynthesis peroxidase dotB |
| R: CAAGTTGCCATCGAACACGG |
| *SS1G_13234* | F: ATCGGTGTGACCATTGCCTT | MFS-type efflux pump MFS2 |
| R: AAACAAGCACCACACATCGC |
| *SS1G_10892* | F: AACACCATCAGCCAGCACAT | Hydrophobic surface binding protein A |
| R:TGCGGTGAGGAGTTTGTTGT |
| *SS1G_02531* | F: TCAACCCAATCAGCCAGGAC | predicted protein |
| R: TCTTCCTCCGAGTTCGTTGC |
| *SS1G_13029* | F: GTGAACTGCTTGACTTGGCG | predicted protein |
| R: GCCTGGTTTGCACTGTCTTG |
| *SS1G_13030* | F: AGTCTTGCTCTCGTCACAGC | predicted protein |
| R: GTGCTGGATTACCACCGACA |
