# Supplementary material
Source: Research Square preprint supplement (doi:10.21203/rs.3.rs-9601471/v1)
Supplement: Supplementary file 2 [file fff4859afc5bb04508c3eb57.docx]

**Table 1** Antimicrobial or beneficial compounds identified in the culture filtrate of strain SGTSH 0811

| Metabolite | Formula | HMDB Superclass | Retention time | M/Z | RSD | Mass Error | Height |
| --- | --- | --- | --- | --- | --- | --- | --- |
| Felotaxel | C31H32N2O6 | [Benzenoids](http://classyfire.wishartlab.com/tax_nodes/C0000012" \o "" \t "/Users/princess_wang/Documents\\x/_blank) | 4.72 | 529.2864 | 0.09109112 | 0.128905326 | 3.17E+06 |
| Ligustroside | C25H32O12 | Lipids and lipid-like molecules | 5.28 | 525.2458 | 0.098532579 | 0.139443264 | 5.42E+06 |
| Trierucin | C69H128O6 | Lipids and lipid-like molecules | 7.59 | 1054.7048 | 0.063974635 | 0.090514742 | 1.79E+06 |
| Ceramide 1 | C63H125NO6 | Lipids and lipid-like molecules | 7.71 | 994.6470 | 0.138977613 | 0.196737363 | 1.27E+07 |
| Temsirolimus | C56H87NO16 | [Phenylpropanoids and polyketides](http://classyfire.wishartlab.com/tax_nodes/C0000261" \o "" \t "/Users/princess_wang/Documents\\x/_blank) | 7.95 | 1030.6459 | 0.024620879 | 0.034825244 | 2.24E+07 |
| cardiolipin | C51H98O17P2 | Lipids and lipid-like molecules | 8.33 | 1045.6613 | 0.026059915 | 0.036861078 | 4.69E+07 |
| Cyclolinopeptide B | C56H83N9O9S | Organic acids and derivatives | 8.67 | 1058.6758 | 0.004348269 | 0.006149569 | 4.63E+07 |
| Levallorphan | C19H25NO | Alkaloids and derivatives | 9.15 | 284.2947 | 0.22091225 | 0.312905886 | 1.13E+07 |
| Pafenolol | C18H31N3O3 | Benzenoids | 10.23 | 338.3417 | 0.183670431 | 0.260087002 | 3.30E+07 |
